# Supplementary material for: Regulatory SNP of RREB1 is Associated With Bone Mineral Density in Chinese Postmenopausal Osteoporosis Patients
Source: Front Genet. 2021 Nov 18;12:756957. doi: 10.3389/fgene.2021.756957 (PMC8637614; doi:10.3389/fgene.2021.756957)
Supplement: Supplementary file 1 [file Table2.XLSX]

## Sheet: Sheet1
Table S2. Summary statistics of SNPs with p < 1.00E-05.
CHR	SNP ID*	Position#	Minor allele	Samples with genotypes	BETA	SE	L95	U95	STAT	P
6	rs473437	7037477	T	137	0.8415	0.1513	0.5451	1.138	5.563	1.4e-07
10	rs7097906	2326129	G	150	0.9234	0.1685	0.593	1.254	5.479	1.828e-07
3	rs2366540	20925928	C	150	1.05	0.217	0.6247	1.475	4.839	3.279e-06
3	ilmnseq_3:20893271	20893271	C	150	1.064	0.2224	0.6284	1.5	4.785	4.141e-06
17	rs3176827	80190176	A	150	1.169	0.2461	0.6863	1.651	4.749	4.836e-06
17	ilmnseq_17:80190329	80190329	G	150	1.169	0.2461	0.6863	1.651	4.749	4.836e-06
17	ilmnseq_17:80190567	80190567	C	150	1.169	0.2461	0.6863	1.651	4.749	4.836e-06
17	ilmnseq_17:80191161	80191161	T	150	1.169	0.2461	0.6863	1.651	4.749	4.836e-06
17	ilmnseq_17:80191272	80191272	T	150	1.169	0.2461	0.6863	1.651	4.749	4.836e-06
6	ilmnseq_6:7037891	7037891	C	150	0.6982	0.1479	0.4083	0.988	4.721	5.462e-06
6	ilmnseq_6:7017025	7017025	G	150	0.6948	0.1474	0.4058	0.9838	4.713	5.65e-06
6	rs475011	7017059	G	150	0.6948	0.1474	0.4058	0.9838	4.713	5.65e-06
6	kgp7129382	7019586	A	150	0.6948	0.1474	0.4058	0.9838	4.713	5.65e-06
6	ilmnseq_6:7019656	7019656	G	150	0.6948	0.1474	0.4058	0.9838	4.713	5.65e-06
6	ilmnseq_6:7037772	7037772	C	150	0.6736	0.1439	0.3915	0.9557	4.679	6.503e-06
6	ilmnseq_6:7038788	7038788	T	150	0.6736	0.1439	0.3915	0.9557	4.679	6.503e-06
6	ilmnseq_6:7022625	7022625	T	149	0.6639	0.1419	0.3858	0.9419	4.679	6.545e-06
6	rs1615495	7034459	T	150	0.6617	0.1419	0.3835	0.9398	4.663	6.977e-06
6	kgp8680844	7022298	T	149	0.6636	0.1423	0.3846	0.9425	4.663	7.008e-06
11	rs76433159	21077519	C	150	0.7062	0.1534	0.4056	1.007	4.604	8.927e-06
6	rs1750242	7015958	A	150	0.6725	0.1461	0.3861	0.9588	4.603	8.975e-06
1	rs72715801	82240168	G	149	0.992	0.2157	0.5692	1.415	4.599	9.16e-06
1	rs11163372	82247248	T	149	0.9901	0.2158	0.5671	1.413	4.588	9.618e-06
*SNP ID obtained from Illumina Asian Screening Array genotyping chip; # Position based on human reference genome b37.
